# Supplementary material
Source: publisher figshare collection journal article supplement (https://frontiersin.figshare.com/ndownloader/files/13849247)
Supplement: Supplementary file [file 13849247]

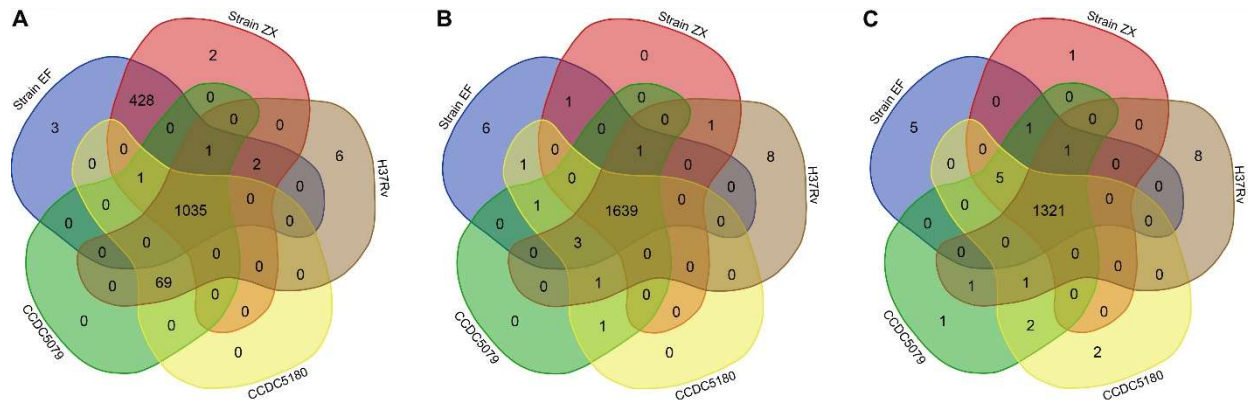

**Supplementary Figure 2** | Venn diagram representing the number of functional categories shared between the five *M. tuberculosis* strains. **(A)** COG, **(B)** Pfam and **(C)** TIGRFam. We only compared the functional categories shared among the genomes of Strain EF and ZX with the *M. tuberculosis* H37Rv, *M. tuberculosis* CCDC5079 and *M. tuberculosis* CCDC5180 strains.
